# Supplementary material for: Constructing ultraviolet nonlinear optical crystals with large second harmonic generation and short absorption edges by using polar tetrahedral S2O3 groups
Source: Royal Society of Chemistry journal article supplement (doi:10.1039/d3qi00172e), 2023-01-01
Supplement: d3qi00172e1.pdf [file d3qi00172e1.pdf]

# Constructing Ultraviolet Nonlinear Optical Crystals with Large second harmony generation and short absorption edge by using polar tetrahedral $S_2O_3$ group

Shixian Ke<sup>a,c</sup>, Huixin Fan<sup>\*a</sup>, Chensheng Lin<sup>a</sup>, Ning Ye<sup>d</sup>, Min Luo<sup>\*a,b</sup>

<sup>a</sup>Key Laboratory of Optoelectronic Materials Chemistry and Physics, Fujian Institute of Research on the Structure of Matter, Chinese Academy of Sciences, Fuzhou, Fujian 350002, P. R. China.

<sup>b</sup>Fujian Science & Technology Innovation Laboratory for Optoelectronic Information of China, Fuzhou, Fujian 350002, China

<sup>c</sup> ShanghaiTech University, Shanghai 200120, China

<sup>d</sup> Tianjin Key Laboratory of Functional Crystal Materials, Institute of Functional Crystal, Tianjin University of Technology, Tianjin 300384, China

## Table of Contents

| Section   | Title                                                                                                                                                          | Page |
|-----------|----------------------------------------------------------------------------------------------------------------------------------------------------------------|------|
| Table S1  | Atomic coordinates ( $\times 10^4$ ) and equivalent isotropic displacement parameters ( $\text{\AA}^2 \times 10^3$ ) for $(\text{NH}_4)_2\text{S}_2\text{O}_3$ | S3   |
| Table S2  | Selected bond lengths ( $\text{\AA}$ ) and angles (degrees) for $(\text{NH}_4)_2\text{S}_2\text{O}_3$                                                          | S3   |
| Table S3  | Anisotropic displacement parameters ( $\text{\AA}^2 \times 10^3$ ) for $(\text{NH}_4)_2\text{S}_2\text{O}_3$                                                   | S3   |
| Table S4  | Direction and magnitude for the dipole moments of the $\text{S}_2\text{O}_3$ and $\text{NH}_4$ groups in $(\text{NH}_4)_2\text{S}_2\text{O}_3$ .               | S3   |
| Figure S1 | Simulated and experimental powder X-ray diffraction patterns of $(\text{NH}_4)_2\text{S}_2\text{O}_3$                                                          | S4   |
| Figure S2 | EDS analysis for $(\text{NH}_4)_2\text{S}_2\text{O}_3$ . The inset is the SEM image of the tested crystal. Scale bar, 500 $\mu\text{m}$ .                      | S4   |
| Figure S3 | Thermogravimetric-mass curve of $(\text{NH}_4)_2\text{S}_2\text{O}_3$ .                                                                                        | S5   |
| Figure S4 | UV-Vis-NIR diffuse reflectance spectra of $(\text{NH}_4)_2\text{S}_2\text{O}_3$ .                                                                              | S5   |
| Figure S5 | Photograph of $(\text{NH}_4)_2\text{S}_2\text{O}_3$ crystal for the measurement of birefringence.                                                              | S6   |
| Figure S6 | SHG-weighted densities for occupied (a) and unoccupied (b) electronic states for $(\text{NH}_4)_2\text{S}_2\text{O}_3$ .                                       | S6   |
| Figure S7 | The four calculated independent NLO tensors of $(\text{NH}_4)_2\text{S}_2\text{O}_3$ .                                                                         | S6   |

**Table S1. Atomic coordinates ( $\times 10^4$ ) and equivalent isotropic displacement parameters ( $\text{\AA}^2 \times 10^3$ ) for  $(\text{NH}_4)_2\text{S}_2\text{O}_3$** 

| Atom | x       | y        | z       | U(eq) |
|------|---------|----------|---------|-------|
| S(1) | 2070(1) | 5013(2)  | 7283(1) | 10(1) |
| S(2) | 1595(1) | 6829(2)  | 8981(1) | 14(1) |
| O(1) | 3467(3) | 4352(6)  | 7556(4) | 13(1) |
| O(2) | 1934(4) | 6156(7)  | 5832(4) | 18(1) |
| O(3) | 1197(3) | 3175(6)  | 7217(4) | 14(1) |
| N(1) | 1446(4) | 4989(8)  | 2769(5) | 13(1) |
| N(2) | 5000    | 6317(11) | 10000   | 14(1) |
| N(3) | 5000    | 4980(20) | 5000    | 57(3) |

U(eq) is defined as one third of the trace of the orthogonalized  $U_j$  tensor.

**Table S2. Selected bond lengths ( $\text{\AA}$ ) and angles (degrees) for  $(\text{NH}_4)_2\text{S}_2\text{O}_3$** 

|                |            |                |            |
|----------------|------------|----------------|------------|
| S(1)-S(2)      | 1.9751(17) | O(2)-S(1)-S(2) | 109.32(18) |
| S(1)-O(1)      | 1.486(3)   | O(2)-S(1)-O(1) | 108.8(2)   |
| S(1)-O(2)      | 1.465(4)   | O(2)-S(1)-O(3) | 110.4(2)   |
| S(1)-O(3)      | 1.485(4)   | O(3)-S(1)-S(2) | 109.56(16) |
| O(1)-S(1)-S(2) | 109.10(16) | O(3)-S(1)-O(1) | 109.6(2)   |

Symmetry transformations used to generate equivalent atoms

**Table S3. Anisotropic displacement parameters ( $\text{\AA}^2 \times 10^3$ ) for  $(\text{NH}_4)_2\text{S}_2\text{O}_3$** 

The anisotropic displacement factor exponent takes the form:  $-2\pi^2 [ h^2 a^{*2} U_{11} + \dots + 2hka^* b^* U_{12} ]$

|      | U11   | U22   | U33   | U23   | U13   | U12   |
|------|-------|-------|-------|-------|-------|-------|
| S(1) | 8(1)  | 8(1)  | 12(1) | 0(1)  | 0(1)  | -2(1) |
| S(2) | 12(1) | 14(1) | 15(1) | -2(1) | 2(1)  | 2(1)  |
| O(1) | 6(2)  | 14(2) | 18(2) | -4(2) | 1(1)  | -1(1) |
| O(2) | 28(2) | 16(2) | 10(2) | 2(2)  | -4(2) | 0(2)  |
| O(3) | 9(2)  | 8(2)  | 26(2) | -2(2) | -1(2) | -3(2) |
| N(1) | 12(2) | 9(2)  | 17(2) | 0(2)  | 0(2)  | -2(2) |
| N(2) | 9(3)  | 16(4) | 15(3) | 0     | -4(2) | 0     |
| N(3) | 73(7) | 47(6) | 58(6) | 0     | 53(6) | 0     |

**Table S4. Direction and magnitude for the dipole moments of the  $\text{S}_2\text{O}_3$  and  $\text{NH}_4$  groups in  $(\text{NH}_4)_2\text{S}_2\text{O}_3$ .**

| Species                               | Direction |        |        | Magnitude<br>Debye |
|---------------------------------------|-----------|--------|--------|--------------------|
|                                       | x/a       | y/b    | z/c    |                    |
| <sup>i</sup> $\text{S}_2\text{O}_3$   | 3.56      | -8.36  | -10.21 | 13.67              |
| <sup>ii</sup> $\text{S}_2\text{O}_3$  | 3.56      | -8.36  | -10.21 | 13.67              |
| <sup>iii</sup> $\text{S}_2\text{O}_3$ | -3.56     | -8.36  | 10.21  | 13.67              |
| <sup>iv</sup> $\text{S}_2\text{O}_3$  | -3.56     | -8.36  | 10.21  | 13.67              |
| <sup>i</sup> $\text{NH}_4$            | 0.11      | -0.22  | -0.07  | 0.26               |
| <sup>ii</sup> $\text{NH}_4$           | 0.11      | -0.22  | -0.07  | 0.26               |
| <sup>iii</sup> $\text{NH}_4$          | -0.18     | -0.19  | 0.10   | 0.28               |
| <sup>iv</sup> $\text{NH}_4$           | -0.18     | -0.19  | 0.10   | 0.28               |
| <sup>v</sup> $\text{NH}_4$            | 0.08      | -0.09  | -0.004 | 0.13               |
| <sup>vi</sup> $\text{NH}_4$           | 0.08      | -0.09  | -0.004 | 0.13               |
| <sup>vii</sup> $\text{NH}_4$          | -0.11     | -0.22  | 0.10   | 0.27               |
| <sup>viii</sup> $\text{NH}_4$         | -0.11     | -0.22  | 0.10   | 0.27               |
| All $\text{S}_2\text{O}_3$            | 0         | -33.44 | 0      | 33.44              |
| All $\text{NH}_4$                     | -0.2      | -1.44  | 0.25   | 1.48               |
| unit cell                             | -0.2      | -34.88 | 0.25   | 34.88              |

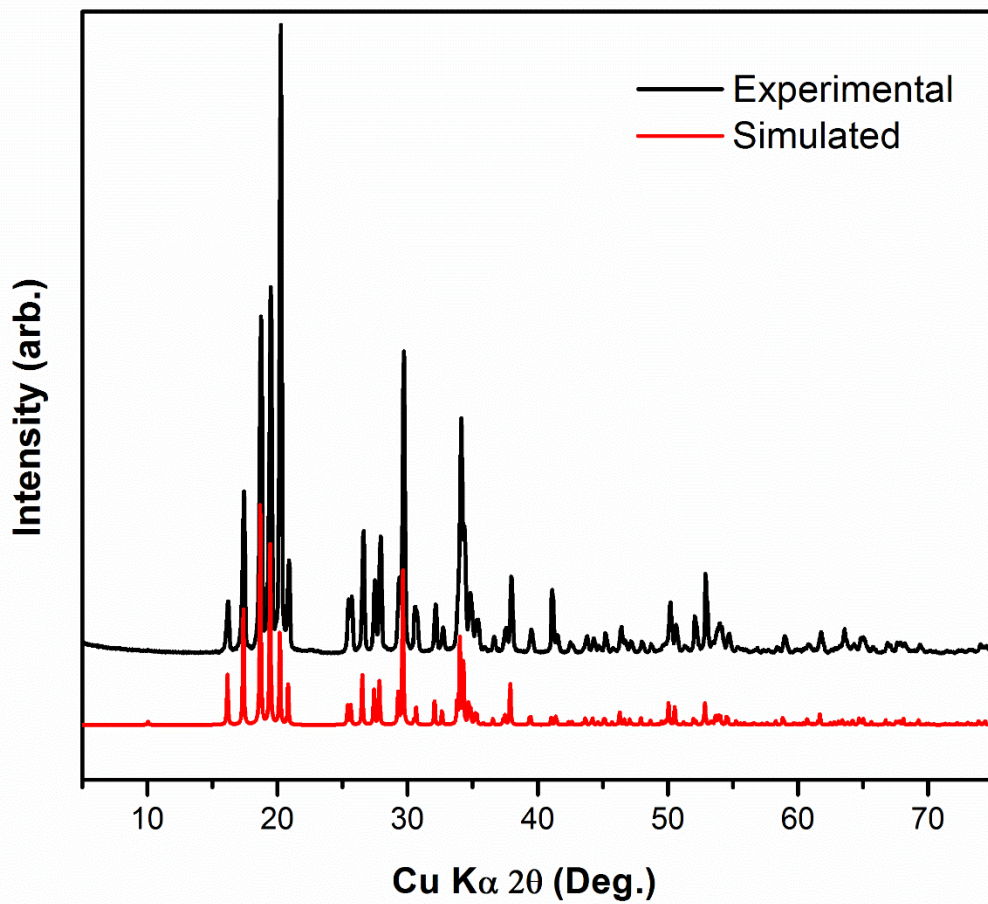

Figure S1. Simulated and experimental powder X-ray diffraction patterns of  $(\text{NH}_4)_2\text{S}_2\text{O}_3$

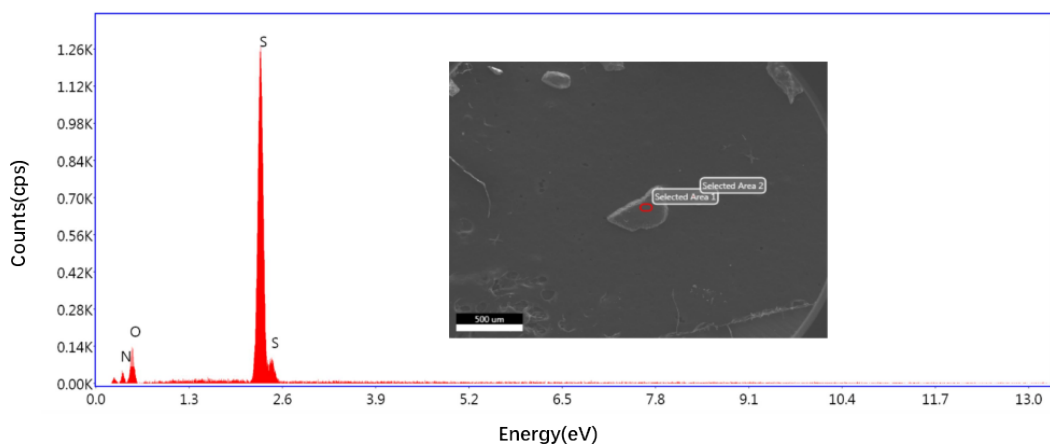

Figure S2. EDS analysis for  $(\text{NH}_4)_2\text{S}_2\text{O}_3$ . The inset is the SEM image of the tested crystal. Scale bar, 500  $\mu\text{m}$ .

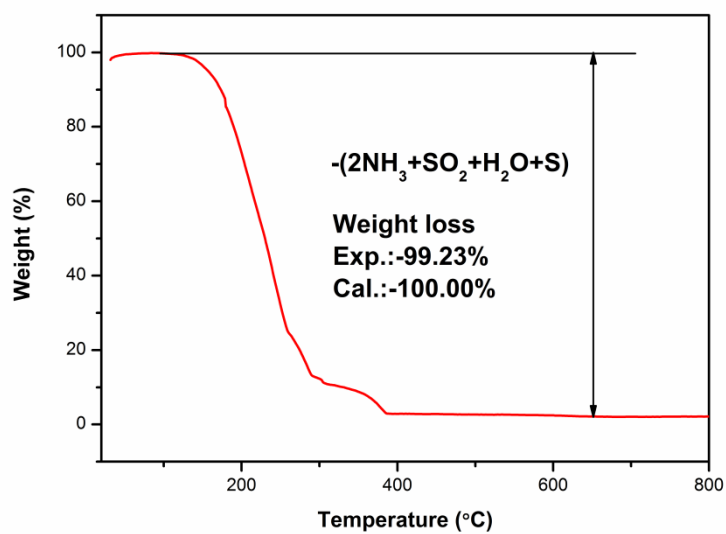

Figure S3. Thermogravimetric-mass curve of  $(\text{NH}_4)_2\text{S}_2\text{O}_3$ .

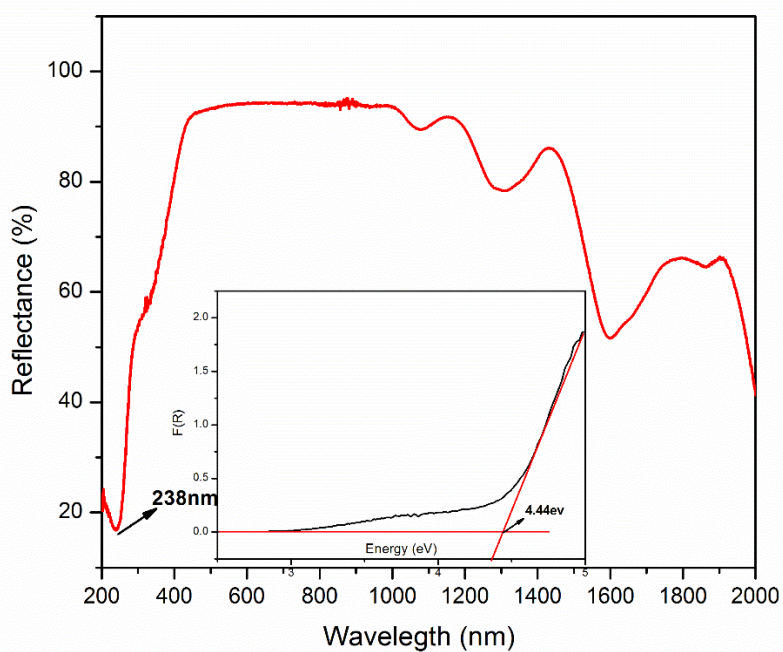

Figure S4. UV-Vis-NIR diffuse reflectance spectra of  $(\text{NH}_4)_2\text{S}_2\text{O}_3$ .

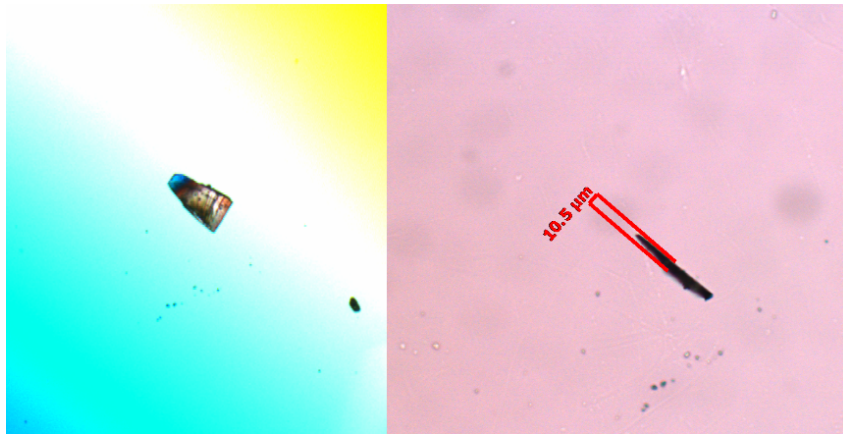

Figure S5. Photograph of  $(\text{NH}_4)_2\text{S}_2\text{O}_3$  crystal for the measurement of birefringence.

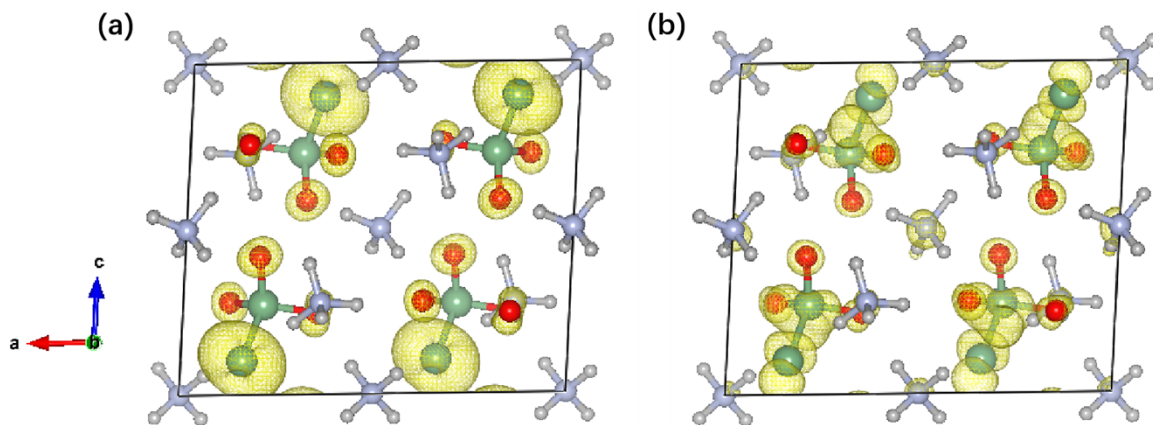

Figure S6. SHG-weighted densities for occupied (a) and unoccupied (b) electronic states for  $(\text{NH}_4)_2\text{S}_2\text{O}_3$ .

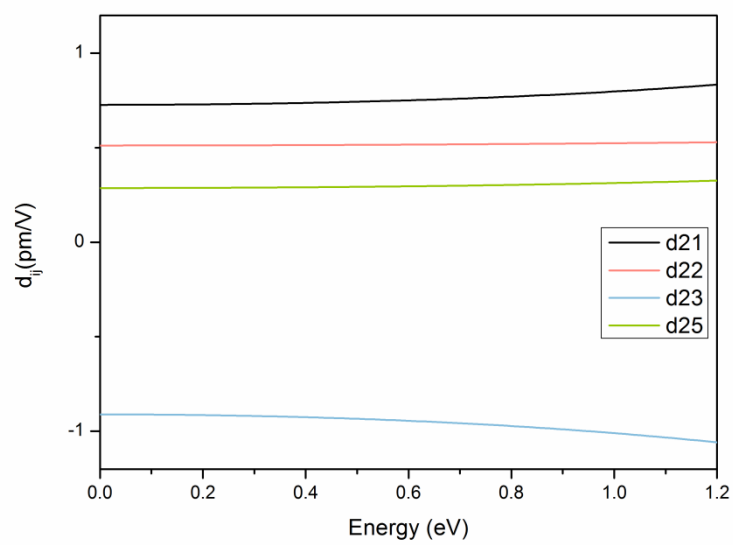

Figure S7. The four calculated independent NLO tensors of  $(\text{NH}_4)_2\text{S}_2\text{O}_3$ .
